# Supplementary material for: Production of indole antibiotics induced by exogenous gene derived from sponge metagenomes
Source: Royal Society of Chemistry journal article supplement (doi:10.1039/c5mb00131e), 2015-03-25
Supplement: c5mb00131e1.pdf [file c5mb00131e1.pdf]

*Supporting information*

**Indole Antibiotics Production Induced by Exogenous Gene  
Derived from Sponge Metagenome**

**Yuya Takeshige<sup>a</sup>, Yoko Egami<sup>a</sup>, Toshiyuki Wakimoto,<sup>a\*</sup> Ikuro Abe<sup>a\*</sup>**

<sup>a</sup> *Graduate School of Pharmaceutical Sciences, The University of Tokyo, 7-3-1 Hongo,  
Bunkyo-ku, Tokyo 113-0033, Japan. Fax: +81 3 5841 4744; Tel: +81 3 5841 4741;  
E-mail: abei@mol.f.u-tokyo.ac.jp*

## LC-MS analysis for compound 2

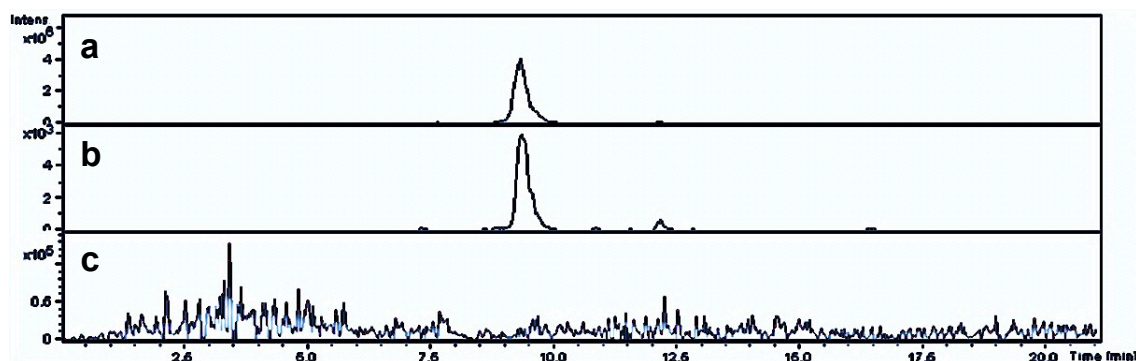

**Figure S1. Extracted ion chromatogram (EIC) for m/z 364**

a) 2,2-di(3-indolyl)-3-indolone (**2**) as a standard, b) Culture solution of *E. coli* harboring ORF 25, c) Culture solution of *E. coli*'s IMPD overexpression

LC-MS analysis was performed on ODS column (COSMOSIL 5C<sub>18</sub> MS-II, 2.0 x 75 mm) with a mixture of H<sub>2</sub>O containing 0.1% acetic acid and MeCN: 0-5 min, 30% MeCN; 5-20 min, 30-100% MeCN. 0.2 mL/min. Positive ESI mode.

**Table S1. <sup>1</sup>H NMR (500 MHz) data for cpd 1 in CDCl<sub>3</sub>**

| Position      | $\delta$ (ppm) | Intensity | Multiplicity    |
|---------------|----------------|-----------|-----------------|
| 1, 1', 1''-NH | 7.96           | 3H        | br. s           |
| 2, 2', 2''    | 6.94           | 3H        | s               |
| 4, 4', 4''    | 7.36           | 3H        | d ( $J = 8$ Hz) |
| 5, 5', 5''    | 7.19           | 3H        | t ( $J = 8$ Hz) |
| 6, 6', 6''    | 7.09           | 3H        | t ( $J = 8$ Hz) |
| 7, 7', 7''    | 7.62           | 3H        | d ( $J = 8$ Hz) |

**Table S2. <sup>1</sup>H NMR (500 MHz) and <sup>13</sup>C NMR (125 MHz) data for cpd 2 in CDCl<sub>3</sub>**

| Position  | <sup>13</sup> C | <sup>1</sup> H | Intensity | Multiplicity    |
|-----------|-----------------|----------------|-----------|-----------------|
|           | $\delta$ (ppm)  | $\delta$ (ppm) |           |                 |
| indoxyl   |                 |                |           |                 |
| 1-NH      | -               | 8.09           | 1H        | br.s            |
| 2         | 68.2            | -              |           |                 |
| 3         | 201.5           | -              |           |                 |
| 3a        | 120.8           | -              |           |                 |
| 4         | 125.5           | 7.73           | 1H        | d ( $J = 8$ Hz) |
| 5         | 119.4           | 6.89           | 1H        | t ( $J = 8$ Hz) |
| 6         | 137.6           | 7.51           | 1H        | t ( $J = 8$ Hz) |
| 7         | 112.9           | 6.91           | 1H        | d ( $J = 8$ Hz) |
| 7a        | 160.3           | -              |           |                 |
| indole    |                 |                |           |                 |
| 1-NH      | -               | 8.10           | 2H        | br. s           |
| 2', 2''   | 124.1           | 6.94           | 2H        | s               |
| 3', 3''   | 115.1           |                |           |                 |
| 3'a, 3''a | 125.7           | -              |           |                 |
| 4', 4''   | 120.4           | 7.36           | 2H        | d ( $J = 8$ Hz) |
| 5', 5''   | 119.9           | 7.19           | 2H        | t ( $J = 8$ Hz) |
| 6', 6''   | 122.3           | 7.09           | 2H        | t ( $J = 8$ Hz) |
| 7', 7''   | 111.4           | 7.62           | 2H        | d ( $J = 8$ Hz) |
| 7'a, 7''a | 137.0           | -              |           |                 |

**Table S3. Proposed ORFs in pDC112 (40.639kb)**

| ORF | Size<br>(aa) | Predicted function                                                                     | Identity<br>(%) |
|-----|--------------|----------------------------------------------------------------------------------------|-----------------|
| 1   | 159          | multi-sensor signal transduction histidine kinase                                      | 43              |
| 2   | 492          | diguanylate cyclase [ <i>Nitrosococcus halophilus</i> Nc4]                             | 29              |
| 3   | 552          | multi-sensor hybrid histidine kinase                                                   | 45              |
| 4   | 195          | putative transmembrane protein [ <i>NC10 bacterium</i> ]                               | 39              |
| 5   | 560          | TonB-dependent receptor, plug [ <i>NC10 bacterium</i> ]                                | 49              |
| 6   | 971          | conserved hypothetical protein, membrane [ <i>Candidatus Poribacteria</i> sp. WGA-A3]  | 48              |
| 7   | 321          | serine/threonine kinase [ <i>Streptomyces griseoaurantiacus</i> M045]                  | 31              |
| 8   | 583          | unnamed protein product [ <i>Desulfobacterium autotrophicum</i> HRM2]                  | 41              |
| 9   | 405          | amidohydrolase [ <i>Sebaldella termitidis</i> ATCC 33386]                              | 39              |
| 10  | 200          | conserved hypothetical protein [ <i>Oscillatoria</i> sp. PCC 6506]                     | 52              |
| 11  | 464          | hypothetical protein NIDE3054 [ <i>Candidatus Nitrospira defluvii</i> ]                | 51              |
| 12  | 236          | proteasome subunit alpha [ <i>Candidatus Nitrospira defluvii</i> ]                     | 59              |
| 13  | 226          | proteasome subunit beta [ <i>Candidatus Nitrospira defluvii</i> ]                      | 59              |
| 14  | 80           | unnamed protein product [ <i>Streptomyces scabiei</i> 87.22]                           | 54              |
| 15  | 491          | putative proteasome component [ <i>NC10 bacterium</i> 'Dutch sediment']                | 54              |
| 16  | 611          | ATPase [ <i>Streptomyces</i> sp. C]                                                    | 58              |
| 17  | 261          | cytochrome c-type biogenesis protein CcsB [ <i>Geobacter</i> sp. FRC-32]               | 37              |
| 18  | 420          | glutamyl-tRNA reductase [ <i>Thermodesulfator indicus</i> DSM 15286]                   | 49              |
| 19  | 322          | hemC-porphobilinogen deaminase [ <i>endosymbiont of Riftia pachyptila</i> (vent Ph05)] | 49              |
| 20  | 322          | hemB-Porphobilinogen synthase [ <i>Thermodesulfator indicus</i> DSM 15286]             | 65              |
| 21  | 155          | RsmD family RNA methyltransferase [ <i>Eubacterium infirmum</i> F0142]                 | 35              |
| 22  | 355          | tRNA-specific 2-thiouridylase MnmA [ <i>Geobacter</i> sp. FRC-32]                      | 54              |
| 23  | 155          | cytoplasmic protein[ <i>Syntrophus aciditrophicus</i> SB]                              | 40              |
| 24  | 638          | DNA mismatch repair protein                                                            | 39              |
| 25  | 499          | inosine-5'-monophosphate dehydrogenase[ <i>Deferribacter desulfuricans</i> SSM1]       | 67              |
| 26  | 1152         | DNA polymerase III subunit alpha[ <i>Geobacter sulfurreducens</i> PCA]                 | 52              |
| 27  | 236          | transporter, MotA/TolQ/ExbB proton channel family [marine gamma proteobacterium]       | 40              |
| 28  | 145          | Biopolymer transport protein ExbD/TolR[ <i>Moritella</i> sp. PE36]                     | 36              |
| 29  | 192          | N-acetyltransferase GCN5                                                               | 40              |
| 30  | 436          | group 1 glycosyl transferase                                                           | 48              |
| 31  | 214          | beta-lactamase domain protein [ <i>Arthrospira maxima</i> CS-328]                      | 39              |

**Table S4. Primer list for subcloning**

| name           | primer sequence                |
|----------------|--------------------------------|
| Fragment 1- Fw | ATATGATCACCATGATTACGCCAAGCTAT  |
| Fragment 1- Re | ACGTGATCAAAACTACCGCATACTCATTT  |
| Fragment 2- Fw | ATATGATCACATCGAAATCCCGTGCGATA  |
| Fragment 2- Re | ATATGATCATCAGAGAAAACATGCCTCGC  |
| Fragment 3- Fw | ATATGATCATATATATGCCGACACCAGCG  |
| Fragment 3- Re | ATATGATCAGCCGGGGTATTGAAAAACAG  |
| Fragment 4- Fw | ATATGATCACATTGGCCACCATGGGATTT  |
| Fragment 4- Re | ATATGATCAATACTTGGGCTCGATCTCTA  |
| Fragment 5- Fw | ATATGATCAATAAGGAAGCGTGATGAGTG  |
| Fragment 5- Re | ATATGATCATTTTCAGTGAGAGGTGCCTAA |

**Table S5. Primer list for *E. coli* IMPD overexpression**

| name                   | primer sequence                |
|------------------------|--------------------------------|
| <i>E. coli</i> IMPD-Fw | AATTGGCCATATGCAATCGGTTACGCTCTG |
| <i>E. coli</i> IMPD-Re | ATAGAATTCTCAGGAGCCCAGACGGTAGTT |

**Table S6. Primer list for *Pichia pastoris* expression**

| name                        | primer sequence                |
|-----------------------------|--------------------------------|
| <i>P. pastoris</i> -IMPD-Fw | GACTAGTATTCGGGCACAACGTTGTCA    |
| <i>P. pastoris</i> -IMPD-Re | TATGAATTCTTAGTCCATCTGATAATTCGG |

## Sequence data for inosine-5'-monophosphate dehydrogenase homolog

The sequence data were analyzed using NCBI BLAST and deposited at DDBJ/EMBL/GenBank (pDC112; accession no. LC027440).

### Nucleotide sequence

ATGTTGGAAGCAACCATACCTATGGGTCTCACGTTTGATGACGTCCTACTCG  
TTCCGGCCCGCTCGGATATCGTGCCGCGGACACGGATGTCTCCACCATTCT  
CACCCATCACATTCCGATGACCATTCCCCTCATCAGTTCCGCTATGGACACC  
GTGACTGAGAGTAGCTTGGCCATTGCCCTGGCCCAGGAGGGCGGCATCGGG  
GTGATTCACAAAACCTGTCCATCGAGGCCCAAGCTGCTGAGGTCGACAAA  
GTGAAACGCTCGGAGAGCGGCATGATTGTGACCCCATACCATGTGCGCCG  
CATCAAACCGTGCAAGACGCCCTCGACGTGATGGCGCGCTACCGCATCTCC  
GGCATTCCGATCACCGAAGGGTCCAAGCTCGTGGGCATTTTGACCAATCGC  
GATCTTCGCTTTGTCAACGACACCGCACAGCTCATTTGCGCCCTGATGACCA  
AAGATAATTTGGTCACCGTGTCCGAGGGCACGAGCCTGGACGAGGCCCAGC  
GCTTGCTCCACGCCACC GCATTGAAAACTTCTGGTGGTTCGACGAATTGTT  
TCACCTCAAAGGGCTCATCACCATCAAAGATATTGAAAAGCGGGCGCAAATA  
CCCGTTGGCCTGCAAAGACGACCTCGGGCGCTTGCGGGTGGGCGCGGCCAT  
TGGGGTGACCCCGATCGCCTCGAGCGCTTGCAAGA ACTGATGCGCTGCGG  
GGTCGATGTGGTGGTGGTTCGACAGTGCACACGGCCACTCGACCAATGTGTT  
GGCAACCATTGAAGAGGTGAAGAAAACGGCGCCGGATCTCCAAGTGATTGG  
CGGCAATGTGGCCACTGCGGGCCGCCACCCGCGACACGATTAACGCGGGGGC  
CGACGCGGTCAAAGTGGGCATTGGACCTGCCTCCATTTGTACCACTCGGGTG  
GTGGCCGGCACCGGCGTGCCGCAGCTCACGGCCATTGCGGAATGCGCCCAG  
GTGGGCGAGCAGTACGGCATTCCGATCATTGCCGATGGCGGGGTGAAGTAC  
TCCGGCGATATTGTTAAAGCGTTGGCGGGCGGGGGCGCACTCGGTAATGATT  
GGCAGTCTGTTTGCCGGGACGGAAGAGAGTCCGGGCGAGCGCGTGCTGTAT  
CAAGGCCGGAGTTACAAAGTGTACCGGGGCATGGGATCGCTCGGGGCGATG  
GCCGGGGGCCACGGCGACCGCTACTTCCAAGGCGAAGAGCGAGAGCTGAG  
CAAGCTCGTGCCGGAAGGCGTCGAGGGCCGCATTCCGTTCAAGGGGGTGCT  
GGCTGACGTGGTCTACCAGCTGGTTCGGCGGGTTGCGAGTGGGCATGGGCTA  
CTGCGGTTGCAAGAGTATCGACGCCTTGCGCCGCGAGGCGCGTTTTGTGCA

AATTACCAATGCCGGGTTCCGGGAAAGCCATGTTACACGACGTGATGGTGAC  
CCAGGAGGCCCCGAATTATCAGATGGACTAA

Amino acid sequence

MLEATIPMGLTFDDVLLVPARSDIVPRDTDVSTILTHHIPMTIPLISSAMDTVTES  
SLAIALAQEGGIGVIHKNLSIEAQAAEVDKVKRSESGMIVDPITMSPHQTVQDAL  
DVMARYRISGIPITEGSKLVGILTNRDLRFVNDTAQLISALMTKDNLVTVSEGTS  
LDEAQRLHAHRIEKLLVDELFLKGLITIKDIEKRRKYPLACKDDLGRRLRVG  
AAIGVTPDRLERLQELMRCGVDVVVVDVAHGHSTNVLATIEEVKKTAPDLQVI  
GGNVATAAATRDTINAGADAVKVGIGPASICTTRVVAGTGVPQLTAAECAQV  
GEQYGIPIIADGGVKYSGDIVKALAAGAHSVMIGSLFAGTEESPGERVLYQGRS  
YKVYRGMGSLGAMAGGHGDRYFQGEERELSKLVPEGVEGRIPFKGVLADVY  
QLVGGLRVGMGYCGCKSIDALRREARFVQITNAGFRESHVHDMVTQEAPNY  
QMD
